# Supplementary material for: Element concentrations in pelagic Sargassum along the Mexican Caribbean coast in 2018-2019
Source: PeerJ. 2020 Feb 26;8:e8667. doi: 10.7717/peerj.8667 (PMC7049257; doi:10.7717/peerj.8667)
Supplement: Supplemental Information 1 [file peerj-08-8667-s001.docx]

**Supplementary tables of manuscript:**

**Element concentrations in pelagic *Sargassum* along the Mexican Caribbean coast**

Rodríguez-Martínez, R.E.1*, Roy, P.D.2*, Torrescano-ValleN.3, Cabanillas-Terán, N.3,4, Carrillo-Domínguez, S.5, Collado-Vides, L.6, García-Sánchez, M.1,7,van Tussenbroek, B.I.1

Supplementary Table 1. Limits of Detection (LOD) of the analyzed elements in Niton FXL energy dispersive XRF (ppm=mg/kg).

| **Element** | **LOD** | **Element** | **LOD** | **Element** | **LOD** | **Element** | **LOD** |
| --- | --- | --- | --- | --- | --- | --- | --- |
| Al | 140 | Cr | 8 | Ni | 10 | Th | 1 |
| As | 4 | Cu | 6 | P | 145 | Ti | 29 |
| Ba | 36 | Fe | 3 | Pb | 2 | U | 4 |
| Ca | 394 | K | 333 | Rb | 1 | V | 3 |
| Cd | 2 | Mg | 2915 | S | 199 | Y | 1 |
| Cl | 266 | Mn | 13 | Si | 342 | Zn | 5 |
| Co | 11 | Mo | 1 | Sr | 6 | Zr | 2 |

Supplementary Table 2. Toxic metals and trace elements maximum levels permitted by different countries in agricultural soils (ppm = mg kg-1). nr: no reported.

| **Country** | **Element** | | | | | | |
| --- | --- | --- | --- | --- | --- | --- | --- |
|  | **As** | **Cd** | **Cr** | **Cu** | **Mo** | **Pb** | **Zn** |
| Austria | 50a | 5a | 100b | 100 b | 10a | 100b | 300b |
| Britain | 20a | 1a | 50 b | 100 b | nr | 100b | 300b |
| Canada | 25a | 8a | 75b | 100 b | 2a | 200b | 400b |
| European Union | nr | nr | nr | 140b | nr | 300b | 300b |
| Germany | 40a | 2a | 200 b | 200 b | nr | 1000b | 600b |
| Japan | 15a | nr | nr | 125 b | nr | 400b | 250b |
| Mexico | 22 c | 37 c | 280 c | nr | nr | 400c | nr |
| Poland | 30a | 3a | 100b | 100 b | 10a | 100b | 300b |

a Galán and Romero, 2008; bBelmonte et al. 2010; c NOM-147-SEMARNAT-SSA1-2004
